# Supplementary material
Source: PubMed Central journal article supplement (PMC4298854)
Supplement: NIHMS29077-supplement.pdf [file NIHMS29077-supplement.pdf]

**Supporting Material To:**

**Toward Orthopoxvirus Countermeasures: A Novel**

**Heteromorphic Nucleoside of Unorthodox Structure**

Xuesen Fan, Xinying Zhang, Longhu Zhou, Kathy A. Keith,  
Mark N. Prichard, Earl R. Kern, and Paul F. Torrence

**Experimental Section**

Melting points were recorded with a Barnstead 1201D electrothermal melting point apparatus and are uncorrected. <sup>1</sup>H NMR and <sup>13</sup>C NMR spectra were recorded on a Varian 400 MHz spectrometer. CD<sub>3</sub>OD was used as solvent. The low resolution mass spectra (LRMS) were performed on a HP 1100 MSD spectrometer at the HT Laboratories, San Diego. The HRMS (High Resolution Mass Spectra) were performed on a JEOL HX 110A spectrometer at the Department of Chemistry, University of Arizona. Silica gel column chromatography was conducted with Sigma-Aldrich silica gel (70~230 mesh).

**Experimental Procedure for the Preparation of 2.**

Ethanol (6 mL) was added to a mixture of 5-formyl-2'-deoxyuridine (**1**, 128 mg, 0.5 mmol), malononitrile (39.6 mg, 0.6 mmol), and 1,3-cyclohexanedione (67.2 mg, 0.6 mmol). The mixture was stirred at 50°C overnight. Upon completion (checked by TLC using of 20% MeOH in CHCl<sub>3</sub>), the mixture was allowed to cool to room temperature. The precipitate was collected by suction, rinsed with cold ethanol, and dried

to give compound **2**. The filtrate was concentrated under reduced pressure and the residue was purified through silica gel column chromatography (CHCl<sub>3</sub>:MeOH, 5:1). The fractions containing the product were combined and concentrated to give the second batch of **2**. The total yield was 168 mg (81%) of **5-(2-amino-3-cyano-5-oxo-5,6,7,8-tetrahydro-4H-chromen-4-yl)-1-(2-deoxypentofuranosyl)-pyrimidine-2,4(1H,3H)-dione (2)**: m.p. 216~218 °C; UV λ<sub>max</sub> = 275 nm (ε = 1.7 x 10<sup>4</sup>); <sup>1</sup>H NMR (CD<sub>3</sub>OD) δ: 1.98~2.03 (m, 2H, -CH<sub>2</sub>, 7 H-chromene), 2.15~2.27 (m, 2H, -CH<sub>2</sub>, 2' H), 2.34~2.36 (m, 2H, -CH<sub>2</sub>, 8 H-chromene), 2.56~2.61 (m, 2H, 6-CH<sub>2</sub>, 5 H-chromene), 3.74~3.81 (m, 2H, 5'-H), 3.92~3.94 (m, 1H, 4' H), 4.17 (s, 1H, -CH, 4 H-chromene), 4.40~4.42 (m, 1H, 3' H), 6.23~6.27 (m, 1H, 1' H), 7.91 (s, 0.5H, 6 H, one isomer, 50%), 7.96 (s, 0.5H, 6 H, another isomer, 50%); <sup>13</sup>C NMR (CDCl<sub>3</sub>) δ: 20.18, 26.81, 30.00, 30.07, 36.51, 36.54, 40.34, 40.43, 55.70, 55.99, 61.76, 61.87, 71.02, 71.18, 85.45, 85.52, 87.89, 87.96, 111.65, 114.86, 115.19, 119.73, 138.62, 138.96, 150.85, 160.31, 160.51, 163.08, 166.74, 166.84, 198.22, 198.25. ESI LRMS *m/e*: 417 (MH<sup>+</sup>), 439 (MNa<sup>+</sup>). HRMS (FAB) Calcd for C<sub>19</sub>H<sub>21</sub>N<sub>4</sub>O<sub>7</sub>: 417.1411 (MH)<sup>+</sup>, found 417.1418.

## Compound Purity

Compound purity was determined by HPLC.

### HPLC conditions:

1. Alltech C18 5 $\mu$  250mm x 4.6mm, 100% water (0-2 min), 0-100% acetonitrile over 23 min, 100% acetonitrile 3 min (25-28 min), 1mL/min, 50  $\mu$ L injection. Detection was at 260 nm, run time 28 min.

Title : fan-III-36 (ARB 05-100872)

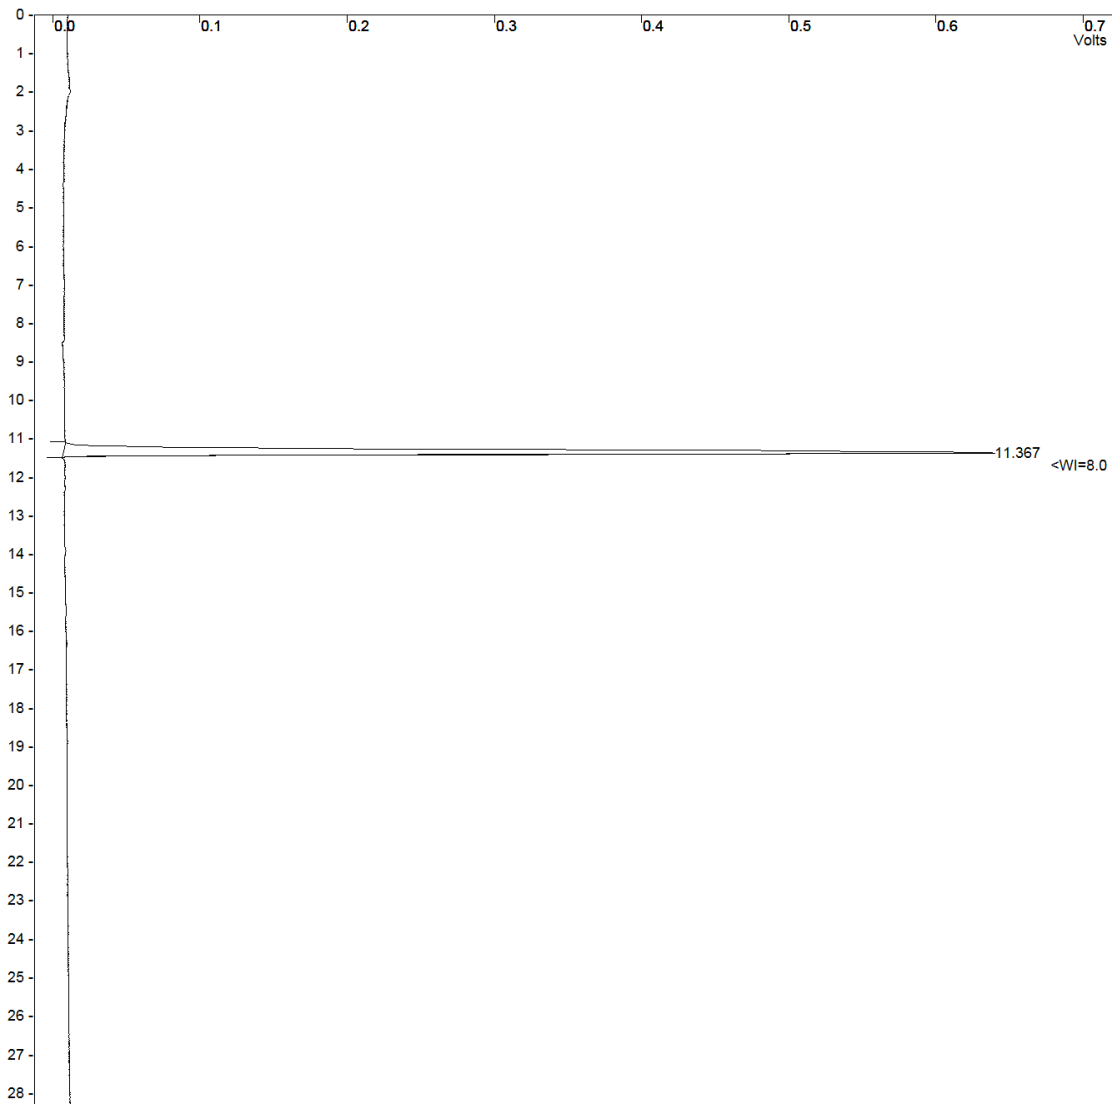

| Peak No. | Peak Name | Result<br>( ) | Ret. Time<br>(min) | Time Offset<br>(min) | Area<br>(counts) | Sep. Code | Width<br>1/2<br>(sec) | Stat Code |
|----------|-----------|---------------|--------------------|----------------------|------------------|-----------|-----------------------|-----------|
| 1        |           | 100.0000      | 11.367             | 0.000                | 5062383          | BB        | 7.7                   |           |
| Totals:  |           | 100.0000      |                    | 0.000                | 5062383          |           |                       |           |
